# Supplementary material
Source: PubMed Central journal article supplement (PMC7094427)

## Supplemental Information

# Nucleotide-Resolution Profiling of RNA Recombination in the Encapsidated Genome of a Eukaryotic RNA Virus by Next-Generation Sequencing

Andrew Routh <sup>\*1</sup>, Phillip Ordoukhanian<sup>2</sup> and John E. Johnson<sup>1</sup>

1) Department of Molecular Biology, The Scripps Research Institute, La Jolla, CA 92037, USA

2) The Next Generation Sequencing Core, The Scripps Research Institute, La Jolla, CA 92037, USA

\*corresponding author:

[arouth@scripps.edu](mailto:arouth@scripps.edu)

Department of Molecular Biology, MB31,

The Scripps Research Institute,

10550 North Torrey Pines Rd,

La Jolla, CA, 92037, USA

Tel: 858-784-8654

Fax: 858-784-8660

## **Supplemental Figure Legends:**

**Supplementary Figure 1: Base composition of donor and acceptor sites.** The average frequency of each nucleotide as indicated was taken for every junction (limited to 100 events per junction to prevent weighting towards unique and highly represented sequences). **A)** 5' strand junction site in RNA 1 junctions, **B)** 3' strand junction site in RNA 1 junctions, **C)** 5' strand junction site in RNA 2 junctions, and **D)** 3' strand junction site in RNA 2 junctions. The level of expected base composition for each nucleotide is shaded in grey and the position of the junction is marked with a blue line.

**Supplementary Figure 2: Read coverage over the FHV genome for FHV-RNAseq and VLP-RNAseq datasets.** The number of reads aligning over the wild type FHV genome is indicated for each nucleotide. **A)** FHV-RNAseq to FHV RNA 2. **B)** VLP-RNAseq to FHV RNA 2. **C)** FHV-RNAseq to FHV RNA 1.

**Supplementary Table 1: Mapping of VLP-RNAseq reads to recombination junctions in genes packaged by VLPs.**

|                      | <b>R2-R2</b> | <b>Ar-Ar</b> | <b>Ac-Ac</b> | <b>R2-Ac</b> | <b>R2-Ar</b> | <b>Ar-Ac</b> | <b>Ac-Ar</b> | <b>Ar-R2</b> | <b>Ac-R2</b> |
|----------------------|--------------|--------------|--------------|--------------|--------------|--------------|--------------|--------------|--------------|
| <b>Total</b>         | 2,168        | 17,462       | 801          | 124          | 82           | 12           | 85           | 51           | 427          |
| <i>MicroIndels</i>   | 1,812        | 17,241       | 583          | -            | -            | -            | -            | -            | -            |
| <i>Recombination</i> | 356          | 221          | 218          | 124          | 82           | 12           | 85           | 51           | 427          |

**Ac** = ORF 1629 from AcMNPV;

**Ar** = 18S rRNA from *Attacus Ricini* rRNA;

**R2** = FHV RNA 2

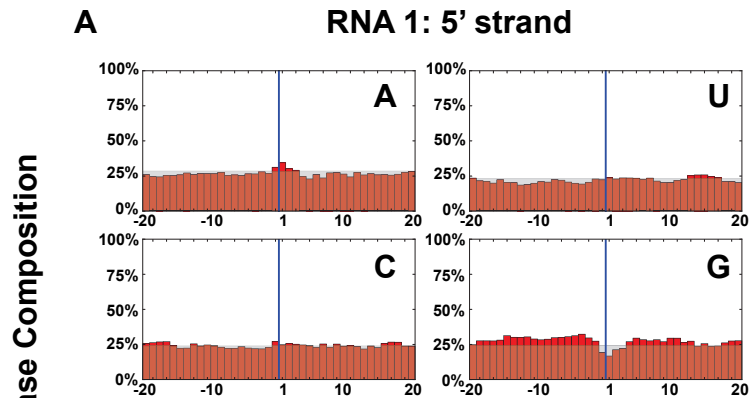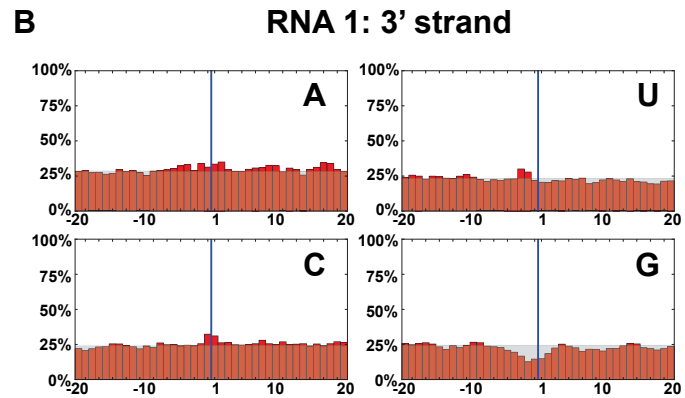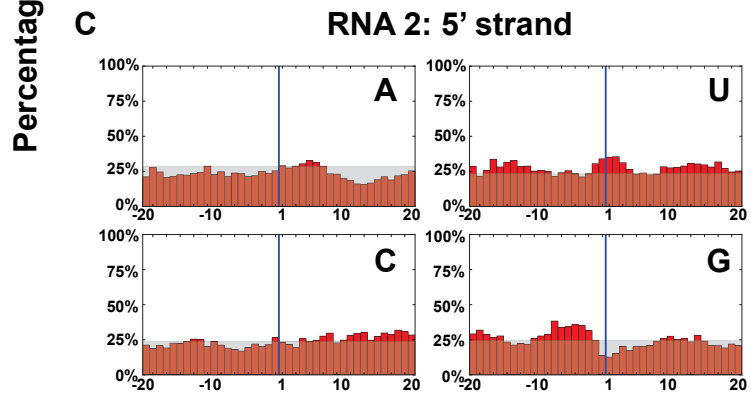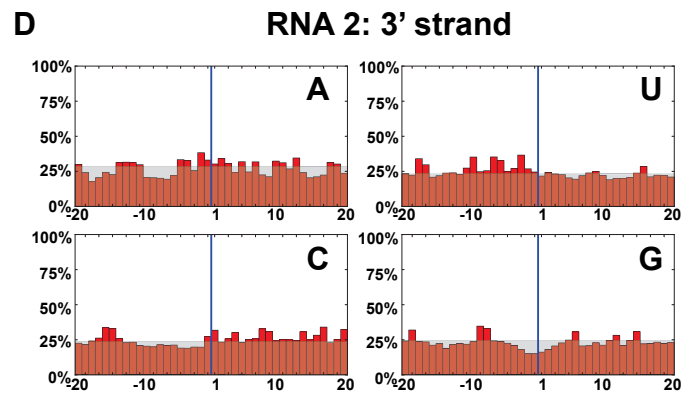

Nucleotide positions relative to junction site

Number of Mapped Reads

**A**

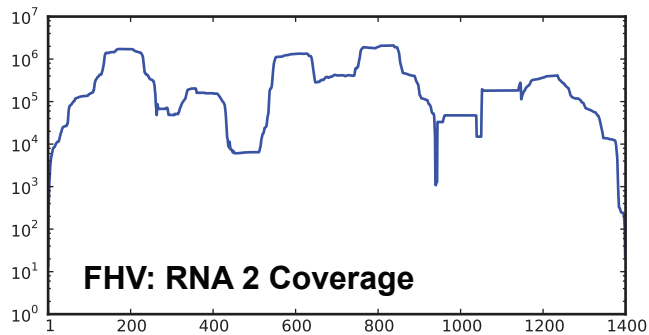

**B**

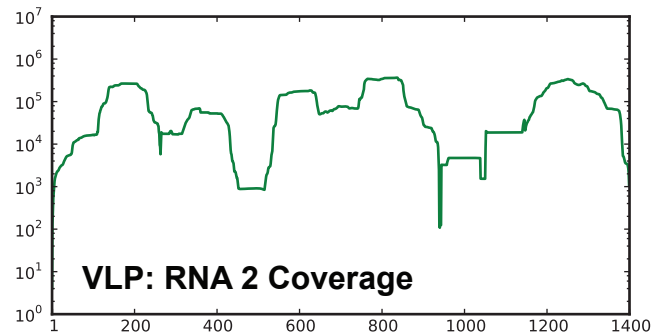

**C**

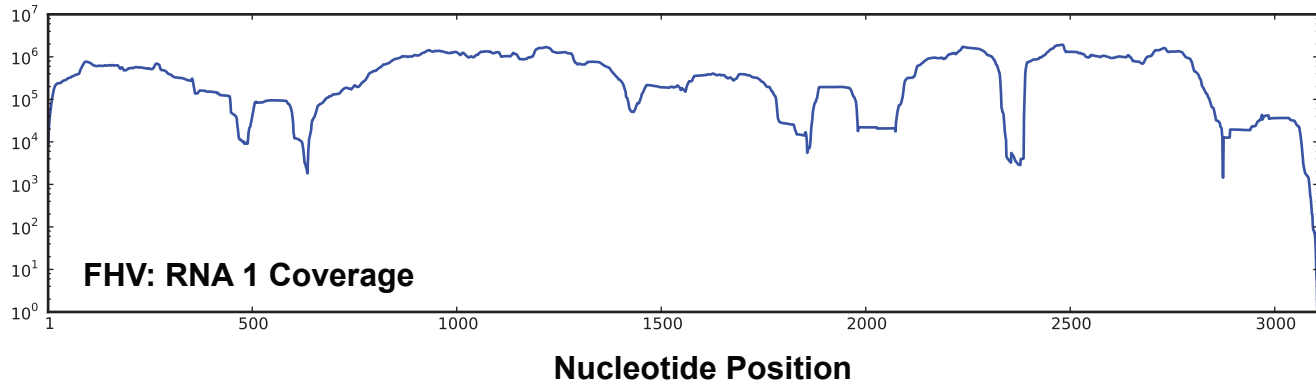

Supplement: mmc1.pdf [file mmc1.pdf]
